# Supplementary figures and images for: Direct observation of particle rearrangement during cyclic stress hardening of magnetorheological gels
Source: Royal Society of Chemistry journal article supplement (doi:10.1039/c2sm26587g), 2012-01-01

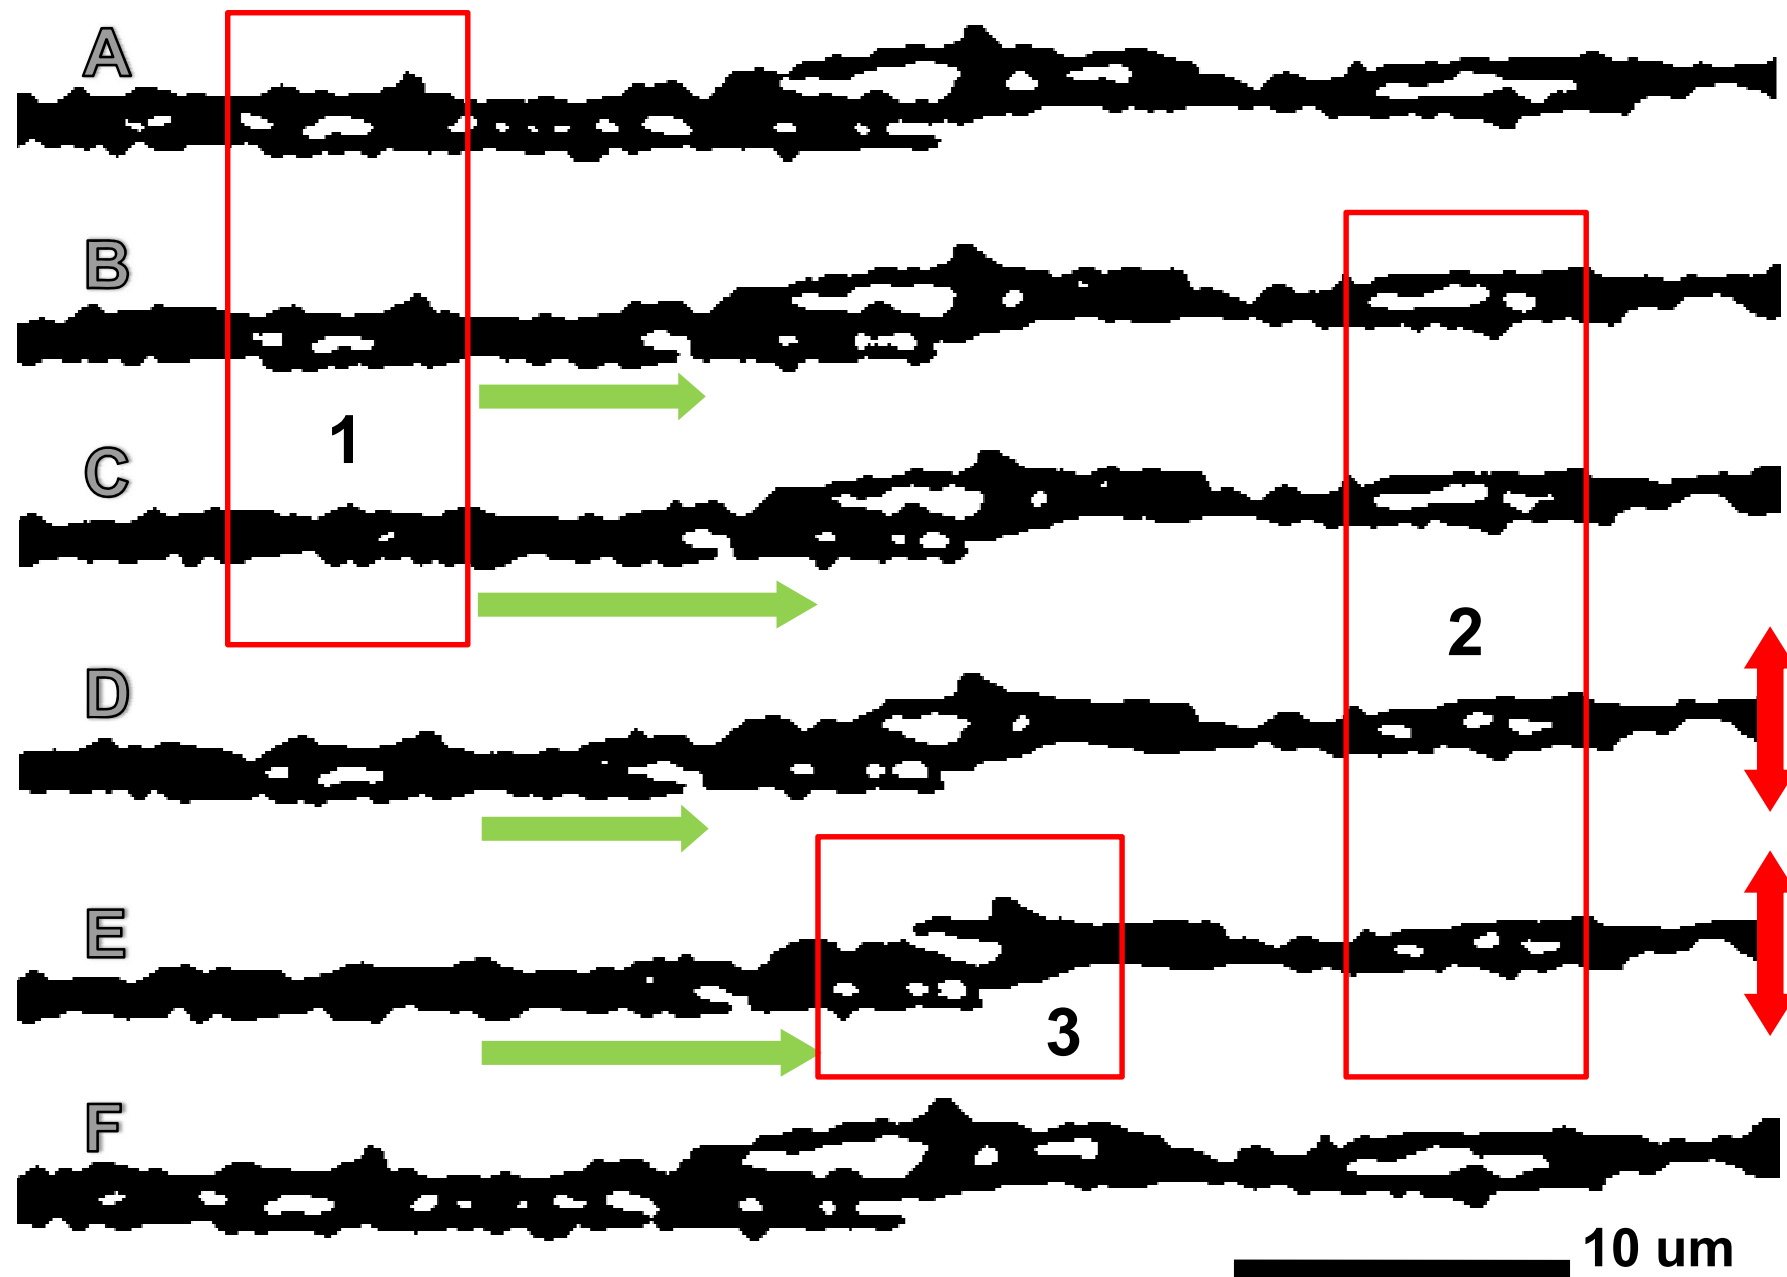

Figure 9

Supplement: c2sm26587g.pdf [file c2sm26587g.pdf]
